# Supplementary material
Source: HighWire-hosted journal article supplement (https://cmajopen.ca/highwire/filestream/89691/field_highwire_adjunct_files/2/open-2022-0095-3-at.pdf)
Supplement: open-2022-0095-3-at.pdf [file open-2022-0095-3-at.pdf]

### Appendix Table 3 for:

## Walk-in Clinic Patient Characteristics and Utilization Patterns in Ontario, Canada: A Cross-Sectional Study

**Appendix Table 3.** Operational definitions of all variables.

| Variable                                      | Data Source      | Definition                                                                                                                                                                                            |
|-----------------------------------------------|------------------|-------------------------------------------------------------------------------------------------------------------------------------------------------------------------------------------------------|
| Age                                           | PCPOP            | AGE in PCPOP, categorized as:<br><18 years<br>19-29 years<br>30-44 years<br>45-64 years<br>65-74 years<br>75+ years                                                                                   |
| Sex                                           | PCPOP            | SEX in PCPOP:<br>Male<br>Female                                                                                                                                                                       |
| Neighborhood income quintile                  | PCPOP            | Nearest census-based income quintile based on postal code (based on 2016 census, INCQUINT in PCPOP).(9)                                                                                               |
| Recent provincial health insurance registrant | PCPOP            | Recent registrant within the past 10 years, used as a proxy for immigration (IMMIG in PCPOP). Missing values are children less than 10 years of age.                                                  |
| Urban/rural residence                         | PCPOP            | Postal code converted to RIO score (RIOG in PCPOP; 10):<br>0-9: Large urban<br>10-39: Small urban<br>40+: rural                                                                                       |
| Comorbidity count                             | DAD, NACRS, OHIP | Count of ACG System Aggregated Diagnosis Groups (ADGs, per the Johns Hopkins ACG® System Version 7, in 2 years prior to the index date.(11) Categorized as:<br>Low: 0-5<br>Moderate: 6-9<br>High: 10+ |
| Healthcare utilization band                   | DAD, NACRS, OHIP | Using Resource Utilization Bands (RUBs), per the Johns Hopkins ACG® System Version 7, in 2 years prior to the index date.(11) Categorized as:<br>Low: 0-2<br>Moderate: 3<br>High: 4-5                 |
| Primary care physician attachment             | PCPOP            | Formally enrolled (R_TYPE=R), virtually attached (R_TYPE=V; highest cost physician over a 2-year period with primary care fee codes), or no primary care physician visits (R_TYPE=N).                 |
| Patient enrolment model (PEM)                 | PCPOP            | Categorized from PROGTYPE3 in PCPOP as:                                                                                                                                                               |

|                                                                                   |               |                                                                                                                                                                                                                                                                                                                                                                                                                                                                                                             |
|-----------------------------------------------------------------------------------|---------------|-------------------------------------------------------------------------------------------------------------------------------------------------------------------------------------------------------------------------------------------------------------------------------------------------------------------------------------------------------------------------------------------------------------------------------------------------------------------------------------------------------------|
|                                                                                   |               | Capitation (Family Health Network or Family Health Organization)<br>Team-based (Family Health Team)<br>Enhanced fee for service (Family Health Group or Comprehensive Care Model)<br>Other group                                                                                                                                                                                                                                                                                                            |
| Total family physician visits in previous two years                               | PCPOP         | Total count of visits in the 2 years prior to the index visit (TVISITS in PCPOP).                                                                                                                                                                                                                                                                                                                                                                                                                           |
| Total specialist visits in previous year                                          | PCPOP         | Total count of specialist visits in the 365 days prior to the index visits (SV_TOTSPEC in PCPOP).                                                                                                                                                                                                                                                                                                                                                                                                           |
| At least one visit with enrolling family physician in the previous year           | PCPOP<br>OHIP | Proportion of patients who had at least one visit with their enrolling physician (R_TYPE=R in PCPOP) in the 2019 calendar year (January 1 <sup>st</sup> , 2019 to December 31 <sup>st</sup> , 2019).<br>If patient is virtually rostered or not rostered, this variable is missing. PCPOP variable PHYSNUM was linked with OHIP.                                                                                                                                                                            |
| Proportion of patients with at least one emergency department visit in prior year | PCPOP         | Any emergency department visit (i.e., all Canadian Triage and Acuity Scale scores) in the 365 days prior to the index visit (ED_CTAST in PCPOP).                                                                                                                                                                                                                                                                                                                                                            |
| Continuity of care                                                                | PCPOP         | Proportion of visits to the patients' own family physician, out of all primary care visits. If less than 2 visits in a year, then this value is missing. From PCPOP, numerator is VIS_OWNP, denominator is TVISITS.                                                                                                                                                                                                                                                                                         |
| Length of enrolment (years)                                                       | CAPE          | Number of years a patient has been in their patient enrolment group (SRTCAPE in CAPE).                                                                                                                                                                                                                                                                                                                                                                                                                      |
| Distance from patient's residence to enrolling family physician's practice        | OHIP          | Distance in kilometres from the patient's primary residence to their rostered physician's clinic location. Postal codes were converted to latitudes and longitudes using the PCCF file. For distances between the patient's residence to the physician's practice (km), we used the quartiles of the continuous distribution of the linear distance to the enrolling family physician in the Ontario population to create the category boundaries:<br><br>0 - < 3 km<br>3 - < 7 km<br>7 - < 16 km<br>+16 km |
| Day of the week of encounter with enrolling physician                             | PCPOP<br>OHIP | Day of the week of the patient's visit with their rostered physician (as define by PHYSNUM in PCPOP).<br>Categorized as:<br>Monday<br>Tuesday                                                                                                                                                                                                                                                                                                                                                               |

|                                                                         |               |                                                                                                                                                                                                                                                            |
|-------------------------------------------------------------------------|---------------|------------------------------------------------------------------------------------------------------------------------------------------------------------------------------------------------------------------------------------------------------------|
|                                                                         |               | Wednesday<br>Thursday<br>Friday<br>Saturday<br>Sunday                                                                                                                                                                                                      |
| After-hours                                                             | OHIP          | Proportion of visits that had a PEM or non-PEM after-hours code billed (i.e., evening or weekend visit). All billing to the same patient by the same physician on the same day were combined and counted once. Codes included: Q012, Q016, Q017, and A888. |
| Distance from residence to enrolling physician's practice in kilometres | OHIP          | Distance from the patient's primary residence to the clinic location (i.e., either walk-in or to their rostered PCP's practice).<br>Categorized as:<br>0 to <3KM<br>3 to <7KM<br>7 to <16km<br>>=16km                                                      |
| Day of the week of encounter                                            | OHIP<br>PCPOP | Day of the week of the walk-in or rostered PCP visit.<br>Categorized as:<br>Monday<br>Tuesday<br>Wednesday<br>Thursday<br>Friday<br>Saturday<br>Sunday                                                                                                     |
